# Supplementary material for: Combined Evaluation of MAP1LC3B and SQSTM1 for Biological and Clinical Significance in Ductal Carcinoma of Breast Cancer
Source: MDPI journal article supplement (doi:10.3390/biomedicines9111514), 2021-10-21
Supplement: s1 [file s1]

## Supplementary materials

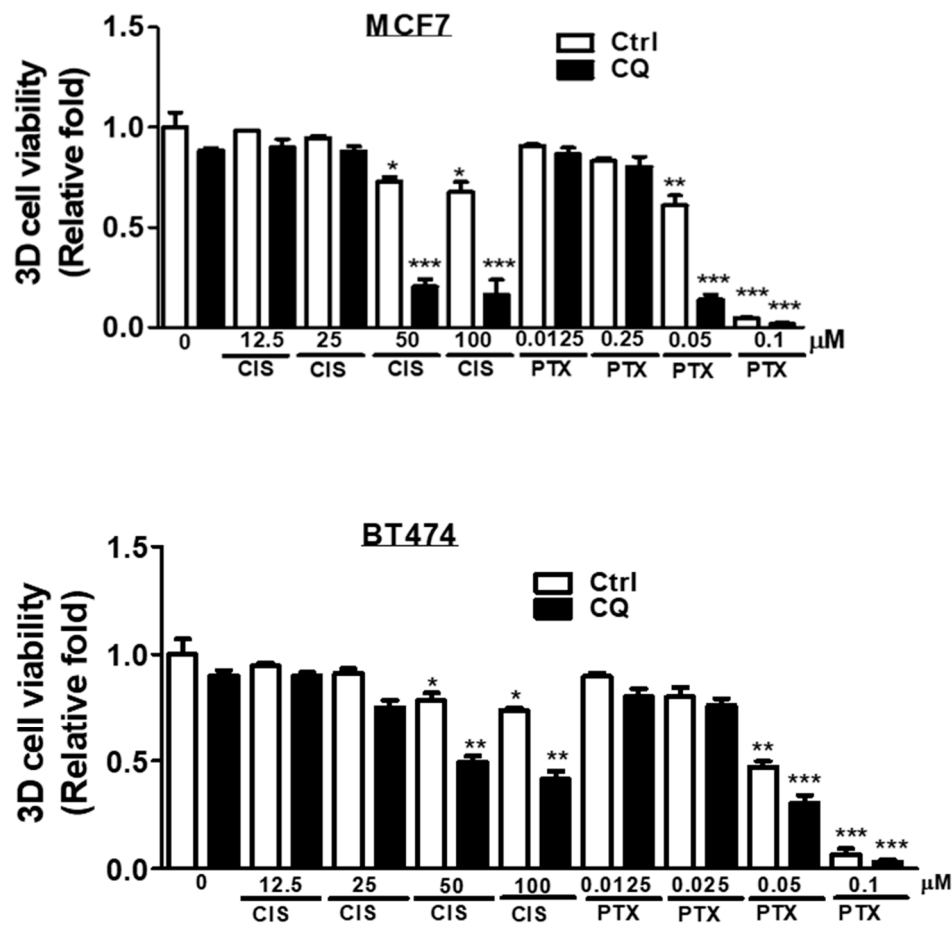

**Figure S1.** Effects of autophagy inhibition on sphere cell viability in breast cancer cell lines treating cancer drugs. (A) MCF7 cells and (B) BT474 cell lines pre-treated with autophagy inhibitor CQ (20 μM) for 1h were cultured in a round bottom ultra-low plate for tumorsphere formation. The tumorspheres were then treated with or without cisplatin (CIS, 0-100 μM) or paclitaxel (PTX, 0-0.1 μM) for 24 h and the sphere cell viability was measured using the CellTiterGlo 3D system. Results represent the mean of three independent experiments.
